# Supplementary material for: Cysteine Biosynthesis in Campylobacter jejuni: Substrate Specificity of CysM and the Dualism of Sulfide
Source: MDPI journal article supplement (doi:10.3390/biom13010086), 2022-12-31
Supplement: s1 [file s1]

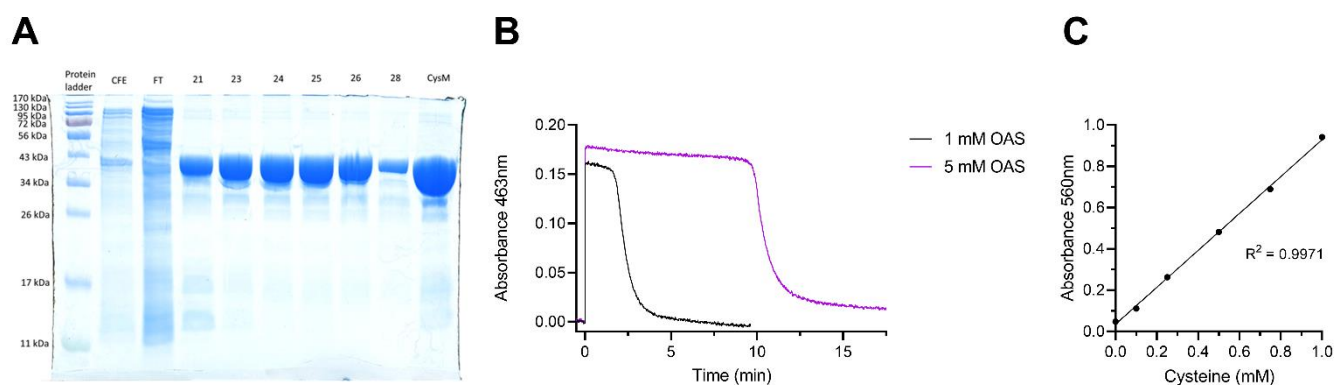

**Figure S1.** (A) SDS-PAGE showing nickel affinity purified CysM protein. CFE: cell free extract; FT: Ni-column flow through; 21-28: Ni-column elution fractions; CysM: Buffer exchanged purified CysM protein. (B) Degradation of the aminoacrylate intermediate of purified CysM in the absence of sulfur acceptor is dependent on the concentration of sulfur acceptor and indicates spontaneous turnover. (C) Standard curve of cysteine used in the acid ninhydrin assays.

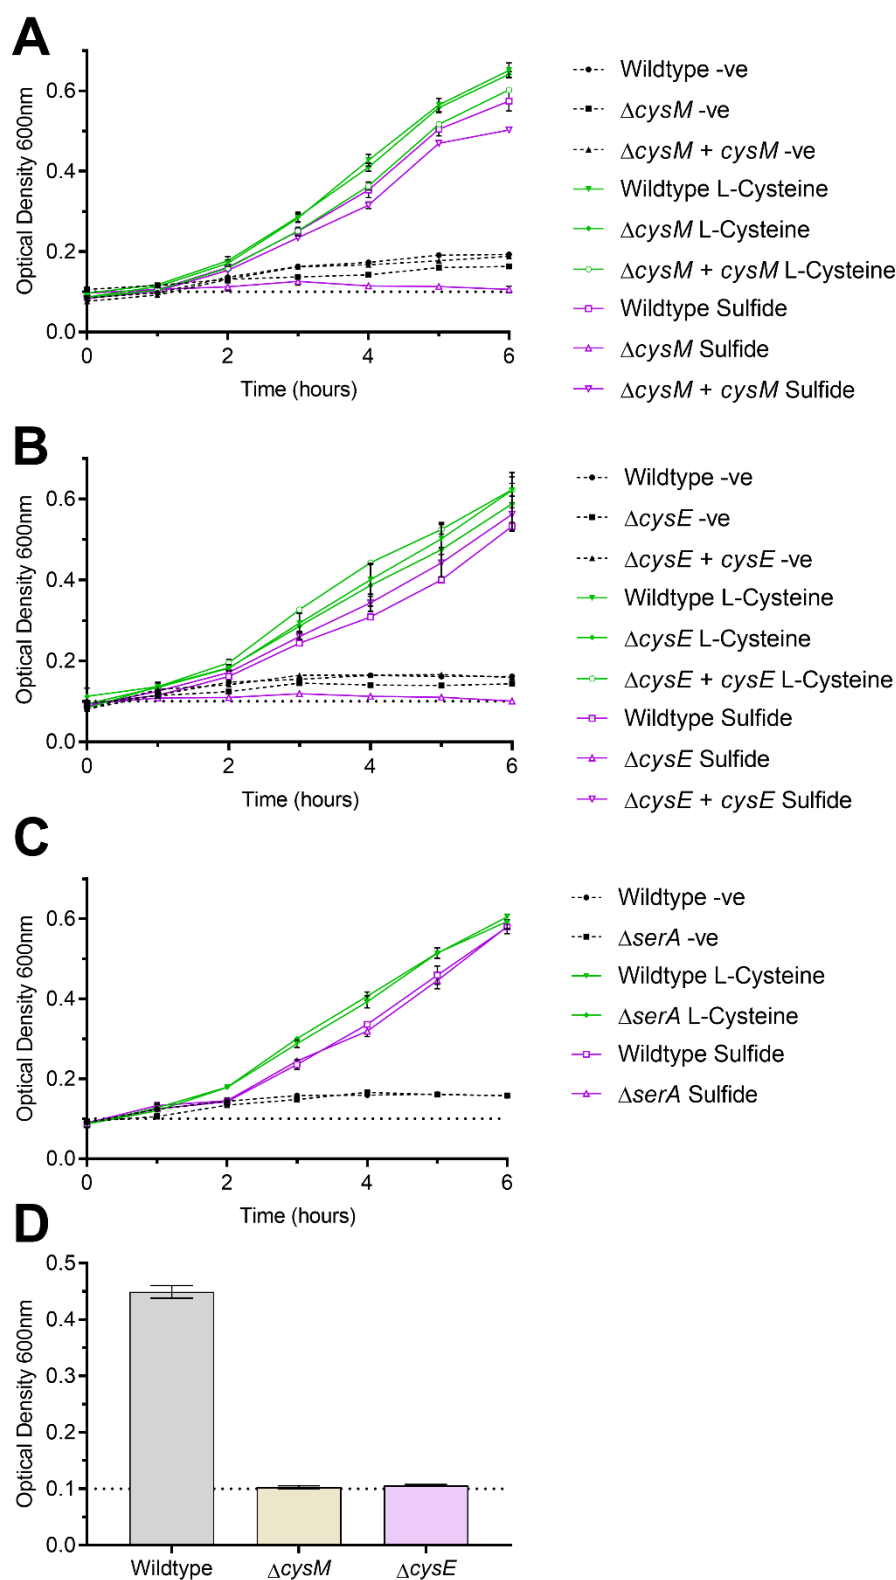

**Figure S2.** Full growth curves in sulfur deficient defined media with either no addition (-), cysteine or sulfide added, for wildtype and (A)  $\Delta cysM$  and genetically complemented strain, (B)  $\Delta cysE$  and genetically complemented strain and (C)  $\Delta serA$ . (D) Growth of wildtype,  $\Delta cysM$  and  $\Delta cysE$  with thiosulfate as sole sulfur source, displayed as the optical density reached after 6 h. In all panels, the inoculum level is indicated by the dashed line.

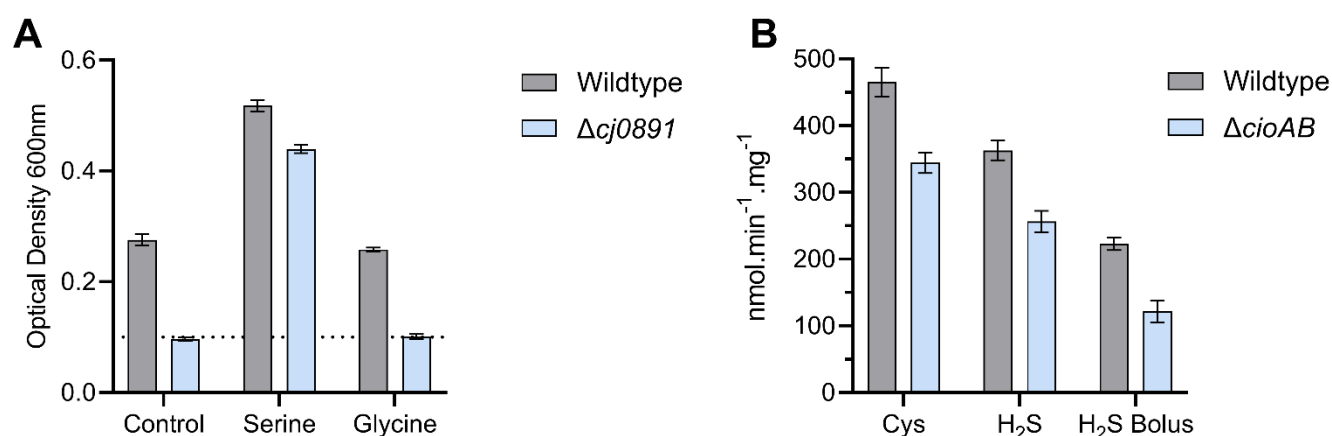

**Figure S3.** (A) Growth of *C. jejuni* NCTC11168 wildtype and *serA* (*cj0891*) mutant on L-Serine minus defined media with the addition of either L-Serine or glycine (10 mM final), displayed as the optical density at 600nm achieved after 6 h. Dotted line indicates the inoculum level. (B) Total oxidase specific activity, calculated in nmol oxygen consumed, per minute, per mg of total protein (see Figure 7).

Table S1. Primers used in this study.

| Primer name   | Sequence 5'–3'                                      | Notes                                                     |
|---------------|-----------------------------------------------------|-----------------------------------------------------------|
| pET280912 fwd | CAGTCATATGAAAGTACATGAAAAAGTAAGTGAG                  | Amplification of <i>cj0912c</i> for insertion into pET28a |
| pET280912 rev | ATGCCTCGAGTTAAGCAAAAAGATCGGT TGAG                   |                                                           |
| KanR fwd      | ATTCTCCTTGTTTCTCATGTTTGACAGCTT AT                   | Amplification of KanR from pJMK30                         |
| KanR rev      | GCACACCTTGGCTAGGTACTAAAACAAT TCAT                   | "                                                         |
| 0912F1        | GAGCTCGGTACCCGGGGATCCTCTAGAG TCATTAGTTGCTCAAACAGCTG | Amplification of downstream flank of <i>cj0912c</i>       |
| 0912R1        | AAGCTGTCAAACATGAGAACCAAGGAG AATCACAAATCATAGCCAAAGAA | "                                                         |
| 0912F2        | GAATTGTTTTAGTACCTAGCCAAGGTGTG CAGGTATATCAAGTGGAGCAA | Amplification of upstream flank of <i>cj00912c</i>        |
| 0912R2        | AGAATACTCAAGCTTGCATGCCTGCAGG TCGTCCGGCAACTCTTAGTTTA | "                                                         |
| 0763F1        | GAGCTCGGTACCCGGGGATCCTCTAGAG TCGCGATGGAGAAATT       | Amplification of downstream flank of <i>cj0763c</i>       |
| 0763R1        | AAGCTGTCAAACATGAGAACCAAGGAG AATATTCCGCTAATCATTCTAGC | "                                                         |
| 0763F2        | GAATTGTTTTAGTACCTAGCCAAGGTGTG CCATTAGAGCCATAGATGCAA | Amplification of upstream flank of <i>cj00763c</i>        |

|                 |                                                             |                                                                     |
|-----------------|-------------------------------------------------------------|---------------------------------------------------------------------|
| 0763R2          | AGAATACTCAAGCTTGCATGCCTGCAGG<br>TCGTGTCAAAATCAGGTTACC       | “                                                                   |
| 0891F1          | GAGCTCGGTACCCGGGGATCCTCTAGAG<br>TCTAAGCACTTCTATGCTTGAAA     | Amplification of downstream flank<br>of <i>cj0891c</i>              |
| 0891R1          | AAGCTGTCAAACATGAGAACCAAGGAG<br>AATGCAACTTCAATATCGCTTAG      | “                                                                   |
| 0891F2          | GAATTGTTTTAGTACCTAGCCAAGGTGTG<br>CCAGTGTTTCAGGAACAGTGT      | Amplification of upstream flank of<br><i>cj0891c</i>                |
| 0891R2          | AGAATACTCAAGCTTGCATGCCTGCAGG<br>TCGCTCATTGAAATCAAAAGGT      | “                                                                   |
| pRRA0912<br>fwd | AATAATGACCCGGGGATCCTCTAGAAAA<br>AAGGATATTAAAATTATGAAAGTACAT | Amplification of <i>cj0912c</i> for<br>complementation plasmid pRRA |
| pRRA0912<br>rev | TTGAAATCTAAACAAGAATCAATTGGCT<br>TTATCTTATTGATGAAAAAGG       | “                                                                   |
| pRRA0763<br>fwd | AATAATGACCCGGGGATCCTCTAGAGCA<br>TAGGAGTTTAGATGAATTTT        | Amplification of <i>cj0763c</i> for<br>complementation plasmid pRRA |
| pRRA0763<br>rev | TTGAAATCTAAACAAGAATCAATTGGCA<br>GAAAATTGCATTTTAC            | “                                                                   |

Table S2. Sulfur limited defined media used in this study.

| Inorganic salts                                                                 | mM final |
|---------------------------------------------------------------------------------|----------|
| Magnesium Sulfate (MgSO <sub>4</sub> ·7H <sub>2</sub> O)                        | 1        |
| Potassium Chloride (KCl)                                                        | 5        |
| Sodium Bicarbonate (NaHCO <sub>3</sub> )                                        | 15       |
| HEPES                                                                           | 15       |
| Sodium Chloride (NaCl)                                                          | 120      |
| Sodium Phosphate monobasic (NaH <sub>2</sub> PO <sub>4</sub> ·H <sub>2</sub> O) | 1        |
| Ammonium sulfate                                                                | 5        |
| Amino acids                                                                     | mM final |
| L-Glycine                                                                       | 2        |
| L-Glutamate K salt                                                              | 2        |
| L-Aspartate K salt                                                              | 2        |
| L-Alanine                                                                       | 2        |

|                                            |                 |
|--------------------------------------------|-----------------|
| L-Arginine hydrochloride                   | 2               |
| L-Asparagine.H <sub>2</sub> O              | 2               |
| L-Tyrosine disodium salt dihydrate         | 2               |
| L-Histidine hydrochloride-H <sub>2</sub> O | 2               |
| L-Isoleucine                               | 2               |
| L-Leucine                                  | 2               |
| L-Lysine hydrochloride                     | 2               |
| L-Phenylalanine                            | 2               |
| L-Threonine                                | 2               |
| L-Valine                                   | 2               |
| L-Proline                                  | 2               |
| L-Tryptophan                               | 2               |
| L-Methionine                               | 2               |
| L-Serine                                   | 5               |
| L-Glutamine                                | 5               |
| <b>Other</b>                               | <b>µM final</b> |
| Sodium Formate                             | 5000            |
| Sodium Pyruvate                            | 5000            |
| Niacinamide                                | 50              |
| D-Calcium pantothenate                     | 10              |
| Vitamin B12                                | 1               |
| i-Inositol                                 | 10              |
| Biotin                                     | 10              |
| Folic acid                                 | 10              |
| Pyridoxal hydrochloride                    | 10              |
| Riboflavin                                 | 10              |

---

|                                                     |                 |
|-----------------------------------------------------|-----------------|
| Thiamine hydrochloride                              | 10              |
| Sodium Metabisulphite                               | 10              |
| Ferrous Sulphate.7H <sub>2</sub> O                  | 25              |
| Ascorbic Acid                                       | 50              |
| <b>Metals</b>                                       | <b>µM final</b> |
| EDTA disodium .2H <sub>2</sub> O                    | 10              |
| Boric acid                                          | 0.1             |
| CuSO <sub>4</sub> .5H <sub>2</sub> O                | 1               |
| ZnCl <sub>2</sub>                                   | 1               |
| MnCl <sub>2</sub> .4H <sub>2</sub> O                | 1               |
| CoCl <sub>2</sub> .6H <sub>2</sub> O                | 1               |
| NiCl <sub>2</sub> .6H <sub>2</sub> O                | 1               |
| Na <sub>2</sub> MoO <sub>4</sub> .2H <sub>2</sub> O | 1               |
| Na <sub>2</sub> WO <sub>4</sub> · 2H <sub>2</sub> O | 0.1             |
| Sodium Selenite                                     | 0.1             |
